# Supplementary material for: Iminopyridine Ni(II) Catalysts Affording Oily Hyperbranched Oligoethylenes and/or Crystalline Polyethylenes Depending on the Reaction Conditions: Possible Role of In Situ Catalyst Structure Modifications
Source: Preprints.org preprint supplement (doi:10.20944/preprints202103.0600.v1), 2021-03-24
Supplement: Supplementary file 1 [file supplementary]

## Supplementary Material

### Iminopyridine Ni(II) catalysts affording oily hyperbranched oligoethylenes and/or crystalline polyethylenes depending on the reaction conditions: possible role of in situ catalyst structure modifications

Ilaria D'Auria<sup>1</sup>, Zeinab Saki<sup>1</sup> and Claudio Pellecchia<sup>1,\*</sup>

<sup>1</sup>Dipartimento di Chimica e Biologia "A. Zambelli", Università di Salerno, via Giovanni Paolo II 132, 84084 Fisciano (SA), Italy

\* Correspondence: [cpellecchia@unisa.it](mailto:cpellecchia@unisa.it)

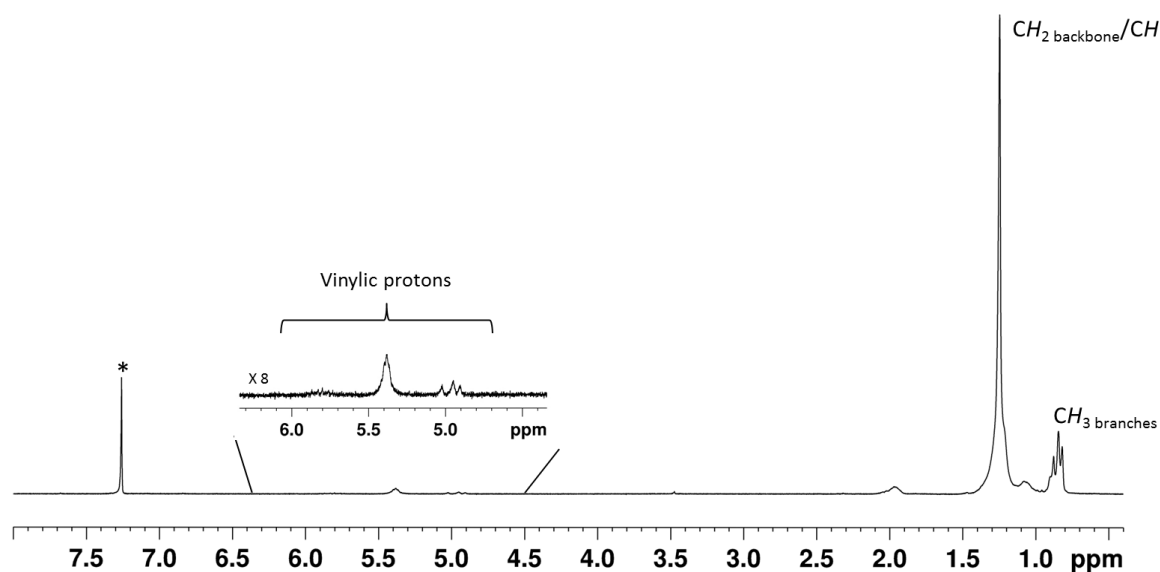

**Figure S1.** <sup>1</sup>H-NMR (CDCl<sub>3</sub>, 400 MHz, 25°C) spectrum of oily fraction obtained in run 1, Table 1 (\* stands for residual solvent).

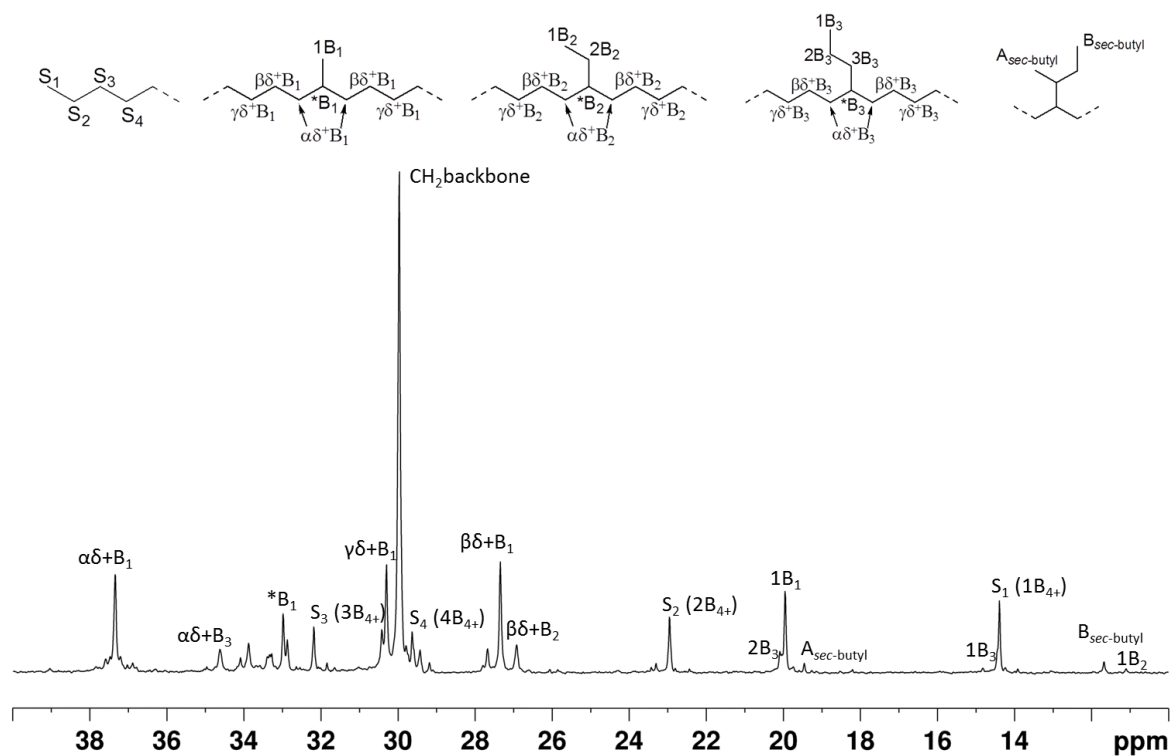

**Figure S2.**  $^{13}\text{C}$ -NMR ( $\text{CDCl}_3$ , 100 MHz,  $25^\circ\text{C}$ ) spectrum of oily fraction obtained in run 1, Table 1.

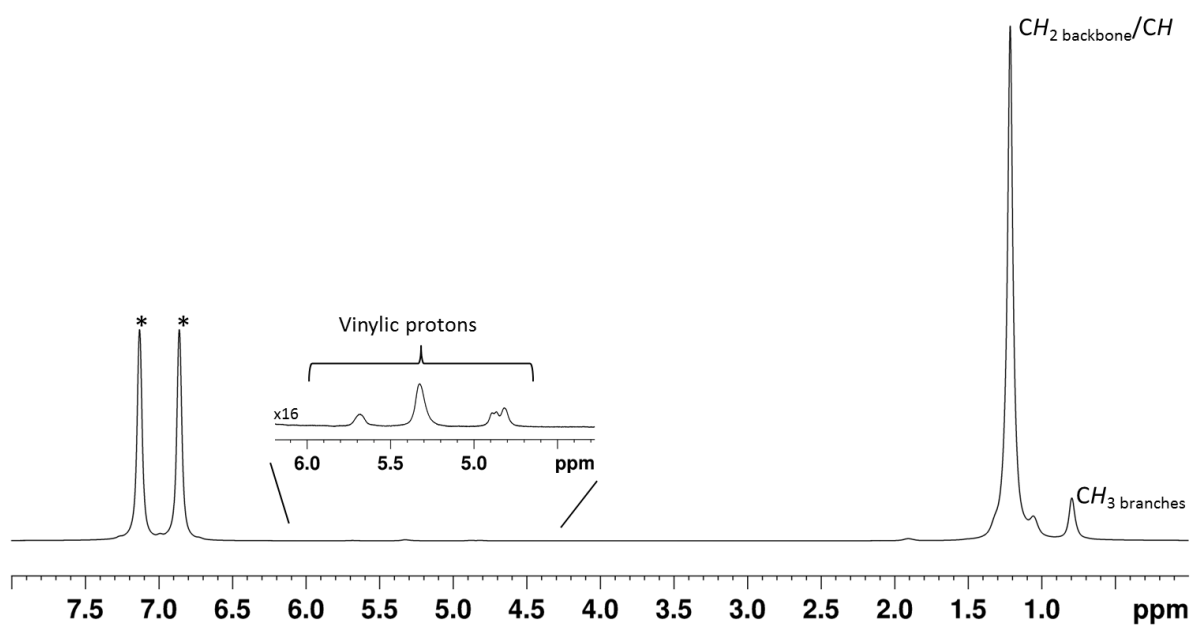

**Figure S3.**  $^1\text{H}$ -NMR ( $\text{C}_6\text{D}_4\text{Cl}_2$ , 600 MHz,  $90^\circ\text{C}$ ) spectrum of solid polymer obtained in run 1, Table 1 (\*\* stand for residual solvent).

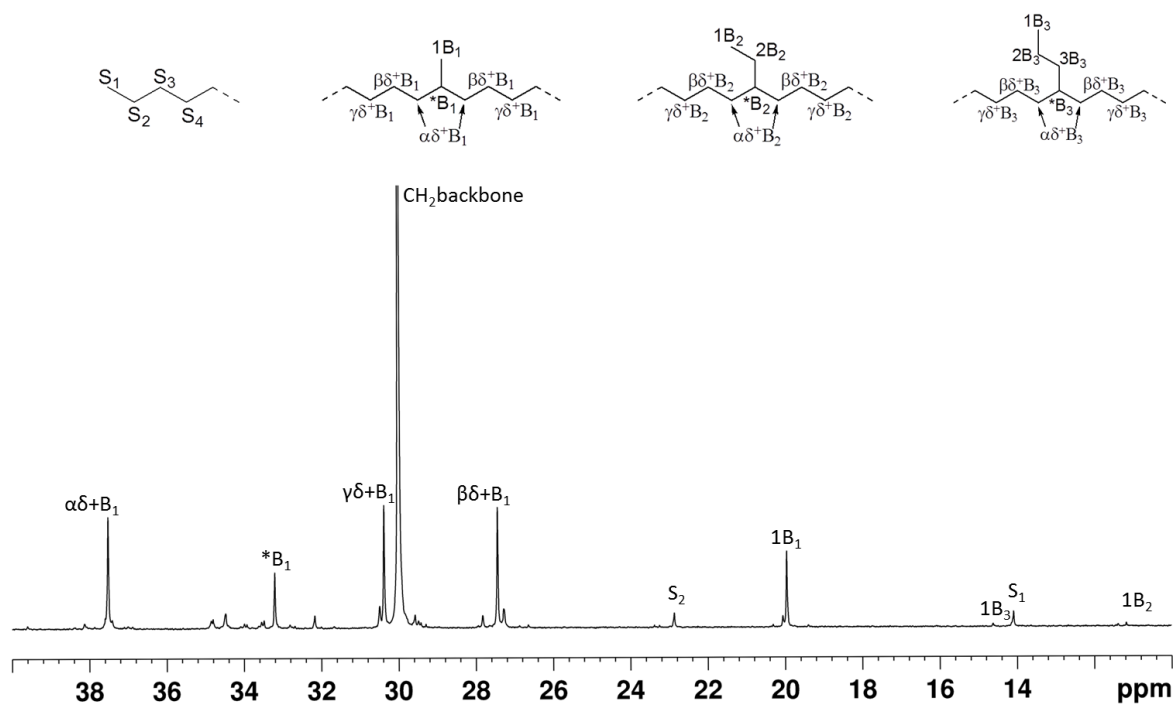

**Figure S4.**  $^{13}\text{C}$ -NMR ( $\text{C}_6\text{D}_4\text{Cl}_2$ , 125 MHz, 90°C) spectrum of solid polymer obtained in run 1, Table 1.

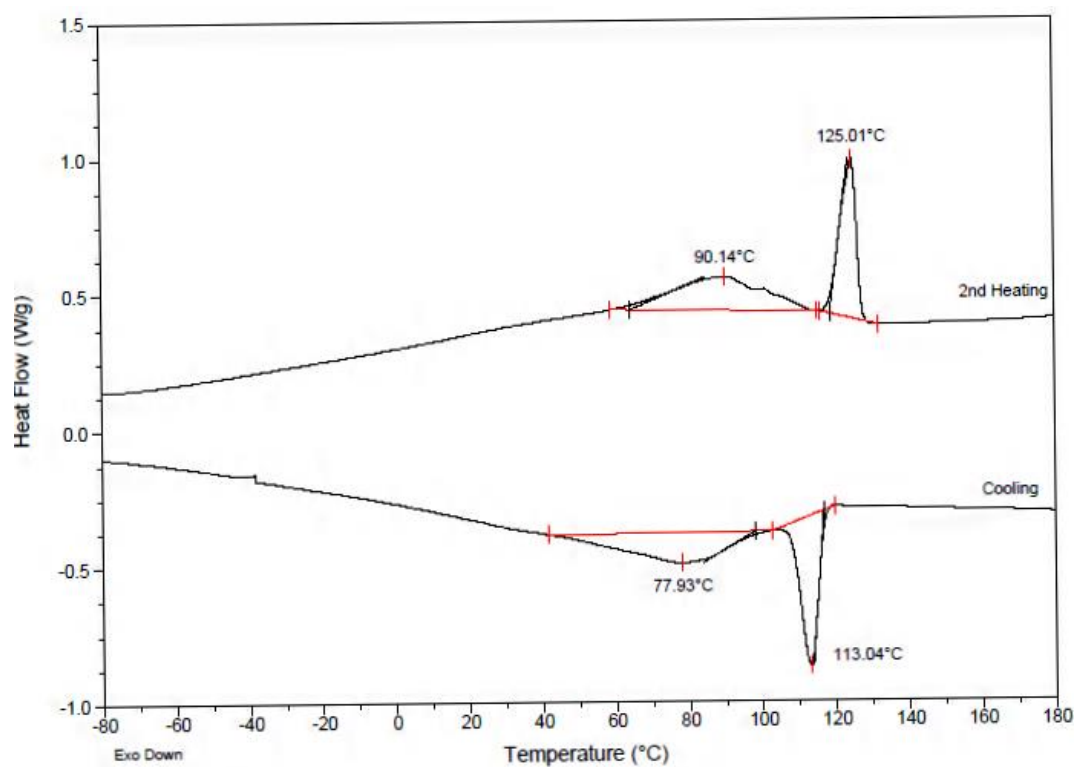

**Figure S5.** DSC thermogram of the solid polymer obtained in run 1, Table 1.

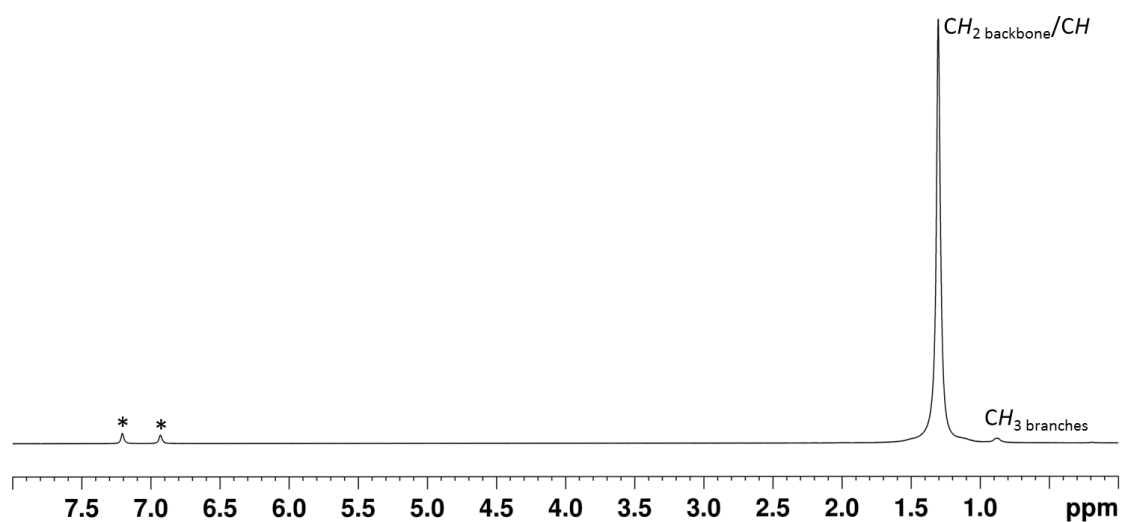

**Figure S6.**  $^1\text{H}$ -NMR ( $\text{C}_6\text{D}_4\text{Cl}_2$ , 600 MHz,  $90^\circ\text{C}$ ) spectrum of the heptane-insoluble part of polymer obtained in run 1, Table 1 (\*\* stand for residual solvent).

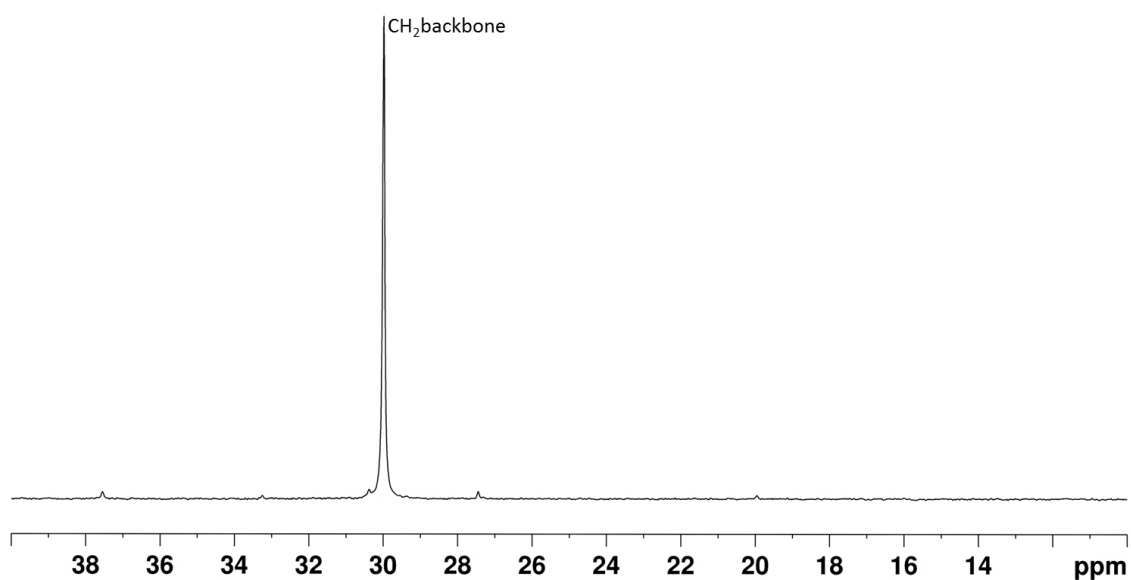

**Figure S7.**  $^{13}\text{C}$ -NMR ( $\text{C}_6\text{D}_4\text{Cl}_2$ , 125 MHz,  $90^\circ\text{C}$ ) spectrum of the heptane-insoluble part of polymer obtained in run 1, Table 1.

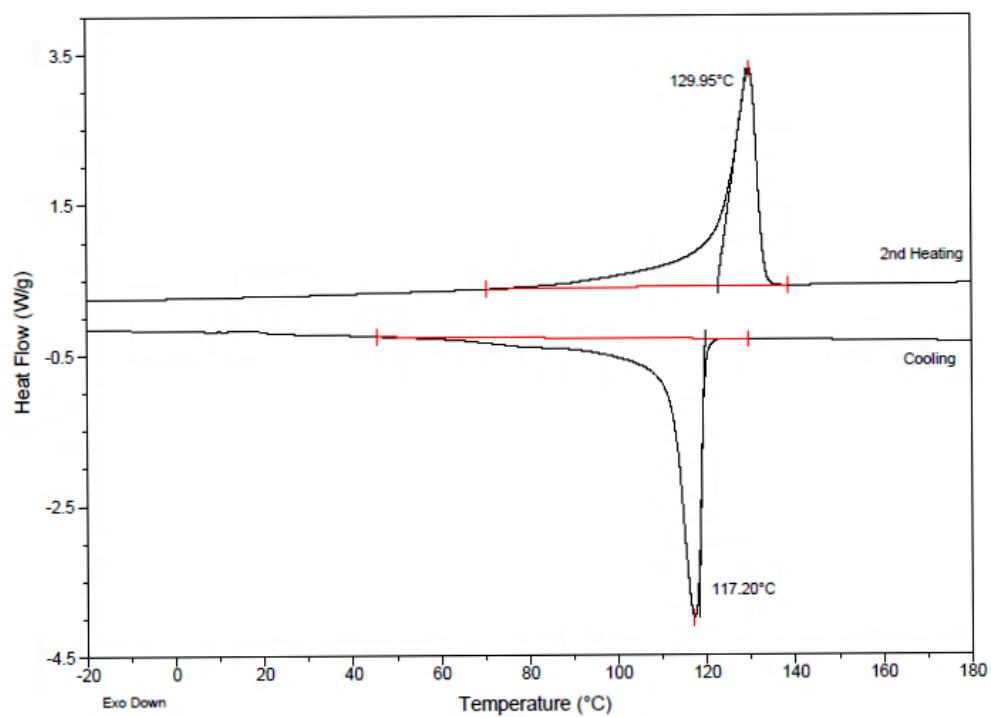

**Figure S8.** DSC thermogram of the heptane-insoluble fraction of polymer obtained in run 1, Table1.

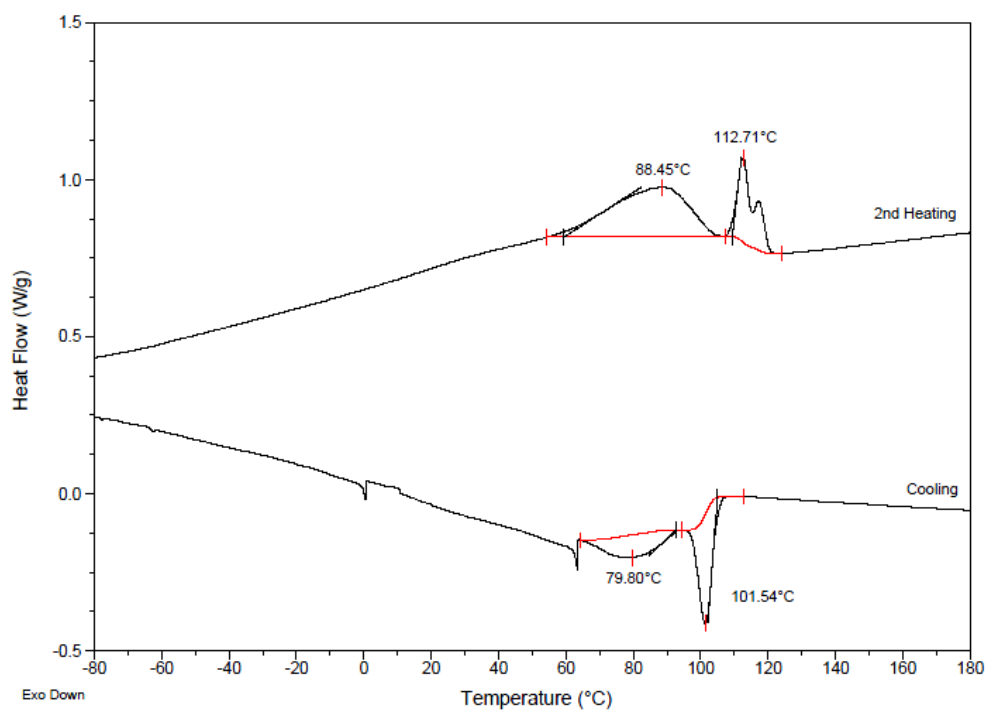

**Figure S9.** DSC thermogram of the heptane-soluble fraction of polymer obtained in run 1, Table1.

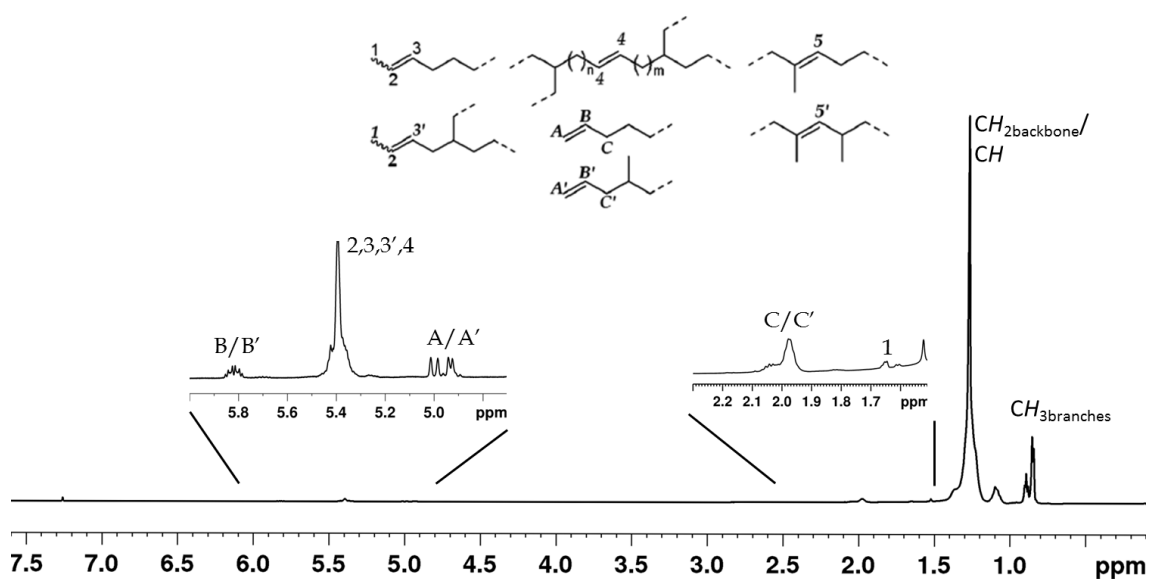

**Figure S10.**  $^1\text{H}$ -NMR ( $\text{CDCl}_3$ , 600 MHz,  $20^\circ\text{C}$ ) spectrum of a typical low MW oily polyethylene sample in Table 1.

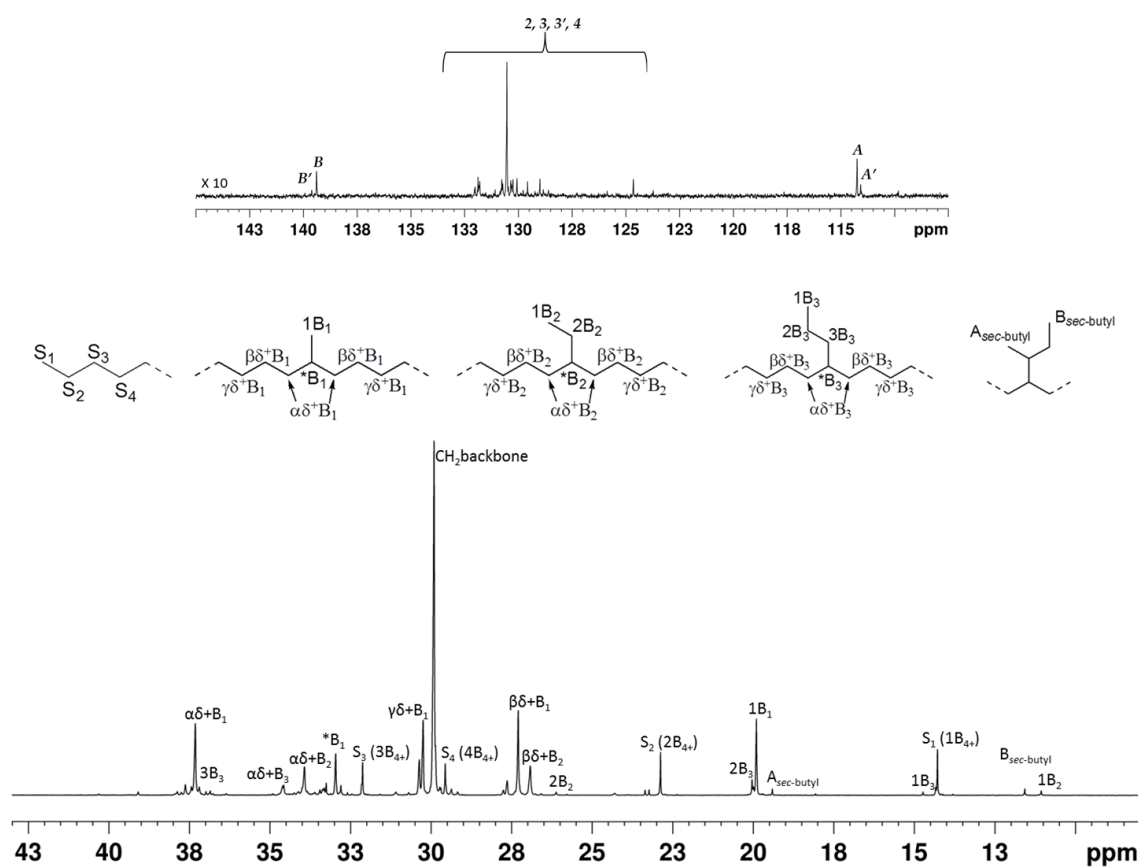

**Figure S11.**  $^{13}\text{C}$ -NMR ( $\text{CDCl}_3$ , 125 MHz,  $20^\circ\text{C}$ ) spectrum of a typical low MW oily polyethylene sample in Table 1.

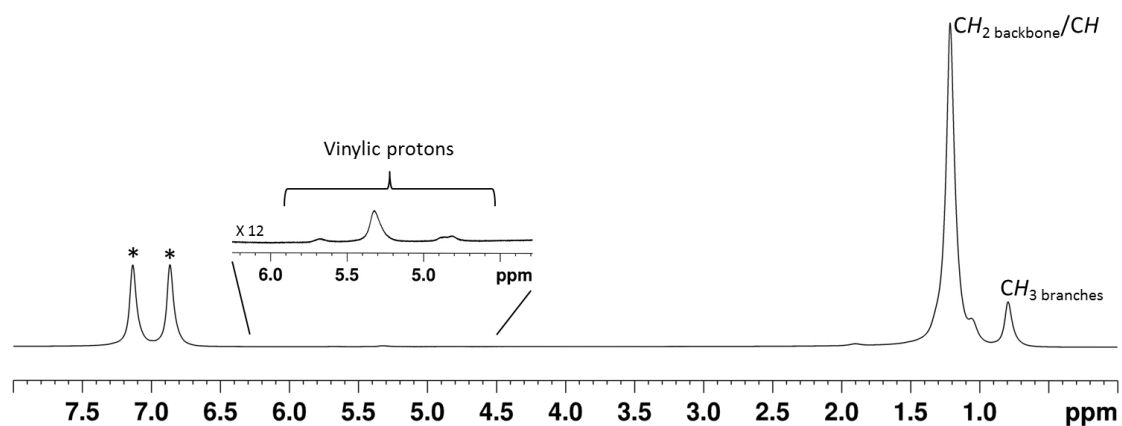

**Figure S12.**  $^1\text{H}$ -NMR ( $\text{C}_6\text{D}_4\text{Cl}_2$ , 600 MHz,  $90^\circ\text{C}$ ) spectrum of the polymer obtained in run 9, Table 1 (\*\* stand for residual solvent).

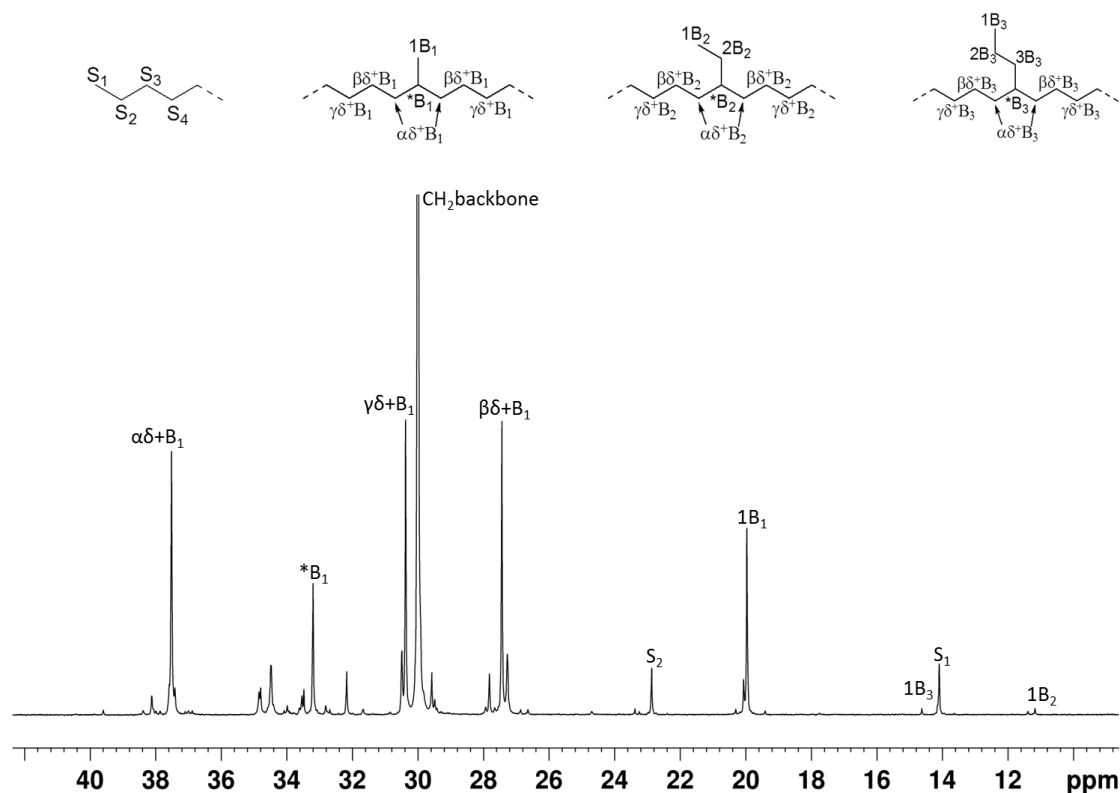

**Figure S13.**  $^{13}\text{C}$ -NMR ( $\text{C}_6\text{D}_4\text{Cl}_2$ , 125 MHz,  $90^\circ\text{C}$ ) spectrum of the polymer obtained in run 9, Table 1.

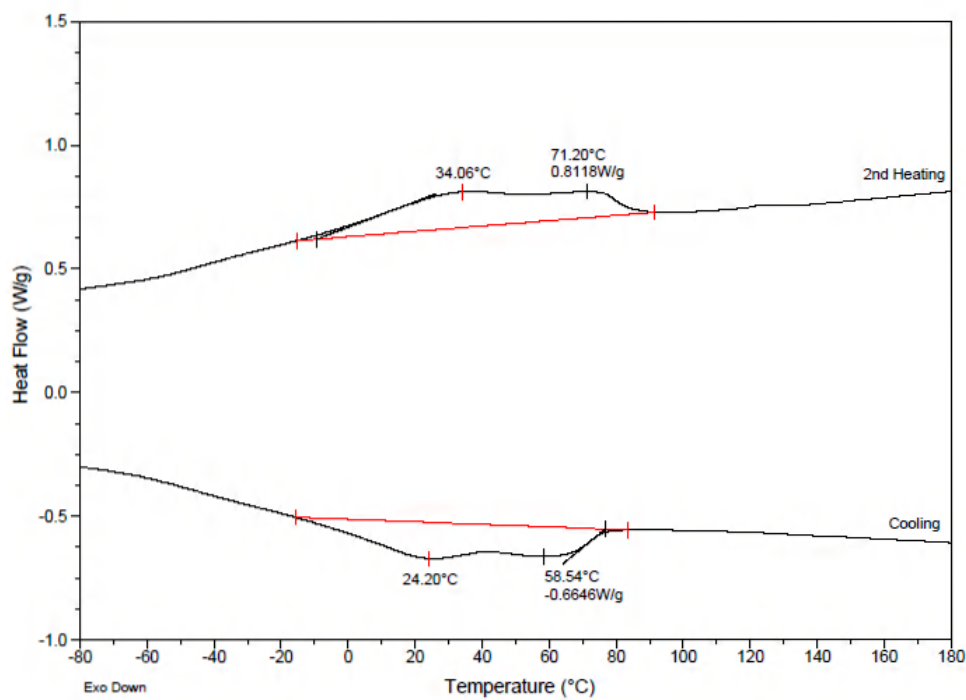

**Figure S14.** DSC thermogram of the solid polymer obtained in run 9, Table 1.

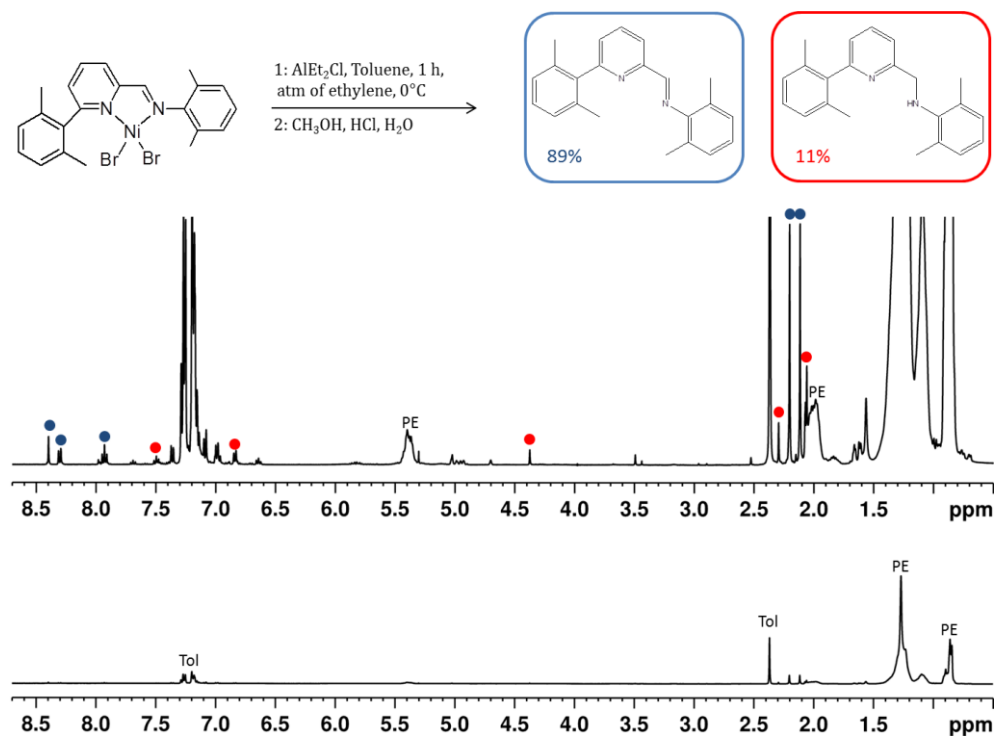

**Figure S14.**  $^1\text{H}$ -NMR ( $\text{CDCl}_3$ , 400 MHz, 20 °C) spectra of the products of reaction between complex 3 and  $\text{AlEt}_2\text{Cl}$  under ethylene pressure.



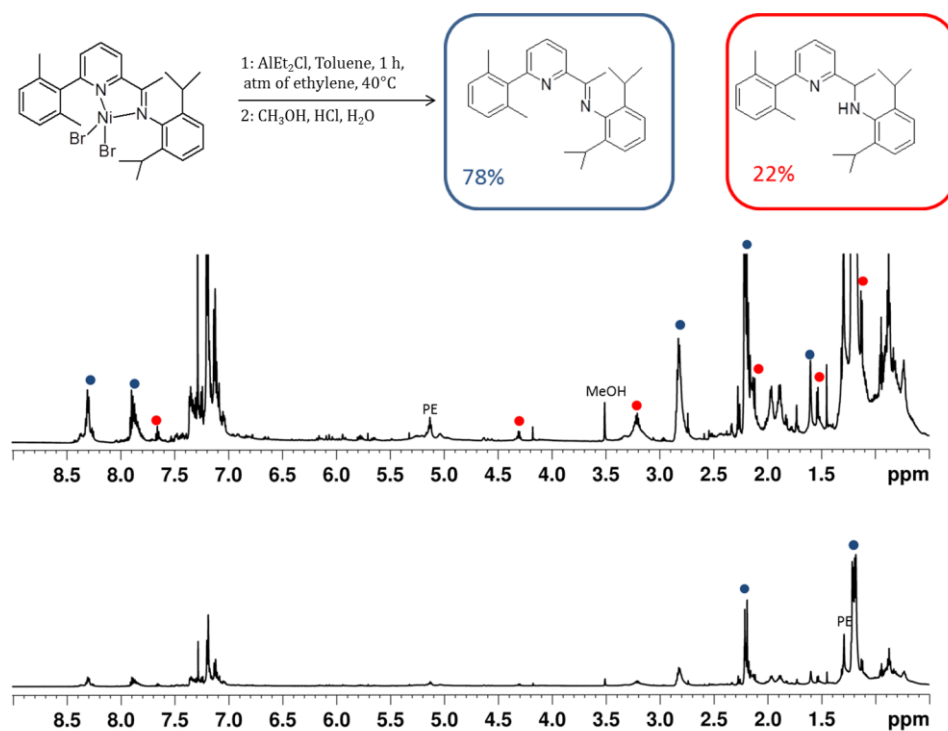

**Figure S15.**  $^1\text{H}$ -NMR (CDCl<sub>3</sub>, 400 MHz, 20 °C) spectra of the products of reaction between complex 2 and  $\text{AlEt}_2\text{Cl}$  under ethylene pressure.
